# Supplementary material for: Cognitive Dysfunction in Patients Treated with Androgen Deprivation Therapy: A Multimodality Functional Imaging Study to Evaluate Neuroinflammation
Source: Hindawi journal article supplement (doi:10.1155/2023/6641707), 2023-10-18

## Supplementary Material

**Table S1.** Mean (SD) SUV, SUVR for patients with rCI and rNC.

|            | Cerebellum     | Temporal lobe  |                | Striatum       |                | Hippocampus    |                | Subcortex      |                | Cortex         |                |
|------------|----------------|----------------|----------------|----------------|----------------|----------------|----------------|----------------|----------------|----------------|----------------|
|            | SUV            | SUV            | SUVR           | SUV            | SUVR           | SUV            | SUVR           | SUV            | SUVR           | SUV            | SUVR           |
| <b>rCI</b> | 1.10<br>(0.39) | 1.01<br>(0.27) | 0.94<br>(0.07) | 0.99<br>(0.31) | 0.91<br>(0.05) | 0.95<br>(0.25) | 0.93<br>(0.11) | 1.01<br>(0.32) | 0.98<br>(0.10) | 1.05<br>(0.29) | 0.97<br>(0.07) |
| <b>rNC</b> | 1.02<br>(0.26) | 0.98<br>(0.22) | 0.97<br>(0.07) | 0.91<br>(0.29) | 0.90<br>(0.07) | 0.98<br>(0.18) | 1.00<br>(0.07) | 0.97<br>(0.20) | 0.99<br>(0.07) | 0.99<br>(0.26) | 0.97<br>(0.06) |

**Table S2.** SUV (g/ml) values calculated in the interval 60 to 90 min.

| Patient     | Whole Brain | Frontal Lobe | Occipital Lobe | Temporal Lobe | Parietal Lobe | Striatum    | Thalamus    | Hippocampus | Amygdala    | Cerebellum  | Subcortex   | Cortex      |
|-------------|-------------|--------------|----------------|---------------|---------------|-------------|-------------|-------------|-------------|-------------|-------------|-------------|
| <b>001</b>  | 0.83        | 0.83         | 0.89           | 0.85          | 0.85          | 0.77        | 0.78        | 0.72        | 0.86        | 0.87        | 0.75        | 0.85        |
| <b>002</b>  | 0.83        | 0.87         | 0.84           | 0.78          | 0.84          | 0.80        | 0.94        | 0.78        | 0.80        | 0.81        | 0.86        | 0.84        |
| <b>003</b>  | 1.01        | 1.04         | 0.99           | 1.03          | 0.97          | 0.96        | 1.08        | 1.05        | 1.07        | 1.05        | 0.97        | 1.02        |
| <b>004</b>  | 1.48        | 1.47         | 1.53           | 1.39          | 1.47          | 1.43        | 1.61        | 1.25        | 1.26        | 1.67        | 1.48        | 1.47        |
| <b>Mean</b> | <b>1.04</b> | <b>1.05</b>  | <b>1.06</b>    | <b>1.01</b>   | <b>1.03</b>   | <b>0.99</b> | <b>1.10</b> | <b>0.95</b> | <b>1.00</b> | <b>1.10</b> | <b>1.01</b> | <b>1.05</b> |
| <b>SD</b>   | <b>0.31</b> | <b>0.29</b>  | <b>0.32</b>    | <b>0.27</b>   | <b>0.30</b>   | <b>0.31</b> | <b>0.36</b> | <b>0.25</b> | <b>0.21</b> | <b>0.39</b> | <b>0.32</b> | <b>0.29</b> |
| <b>101</b>  | 0.99        | 0.95         | 0.99           | 0.96          | 0.90          | 0.92        | 1.21        | 1.09        | 1.07        | 1.10        | 1.06        | 0.96        |
| <b>102</b>  | 1.02        | 1.02         | 1.03           | 1.01          | 0.99          | 0.92        | 1.07        | 1.01        | 1.01        | 1.06        | 0.94        | 1.02        |
| <b>103</b>  | 0.77        | 0.78         | 0.74           | 0.78          | 0.73          | 0.75        | 0.89        | 0.81        | 0.77        | 0.77        | 0.80        | 0.77        |
| <b>104</b>  | 1.38        | 1.44         | 1.43           | 1.33          | 1.43          | 1.21        | 1.37        | 1.21        | 1.21        | 1.40        | 1.26        | 1.42        |
| <b>105</b>  | 0.77        | 0.77         | 0.80           | 0.80          | 0.71          | 0.75        | 0.84        | 0.78        | 0.82        | 0.76        | 0.77        | 0.78        |
| <b>Mean</b> | <b>0.99</b> | <b>0.99</b>  | <b>1.00</b>    | <b>0.98</b>   | <b>0.95</b>   | <b>0.91</b> | <b>1.07</b> | <b>0.98</b> | <b>0.97</b> | <b>1.02</b> | <b>0.97</b> | <b>0.99</b> |
| <b>SD</b>   | <b>0.25</b> | <b>0.27</b>  | <b>0.27</b>    | <b>0.22</b>   | <b>0.29</b>   | <b>0.19</b> | <b>0.22</b> | <b>0.18</b> | <b>0.18</b> | <b>0.26</b> | <b>0.20</b> | <b>0.26</b> |

**Table S3.** SUVR values for each patient calculated between 60 to 90 min. Reference region is the cerebellum (grey matter-masked).

| Patient     | Whole Brain | Frontal Lobe | Occipital Lobe | Temporal Lobe | Parietal Lobe | Striatum    | Thalamus    | Hippocampus | Amygdala    | Cerebellum  | Subcortex   | Cortex      |
|-------------|-------------|--------------|----------------|---------------|---------------|-------------|-------------|-------------|-------------|-------------|-------------|-------------|
| <b>001</b>  | 0.96        | 0.95         | 1.02           | 0.98          | 0.98          | 0.88        | 0.90        | 0.84        | 1.00        | 1           | 0.88        | 0.98        |
| <b>002</b>  | 1.03        | 1.07         | 1.04           | 0.96          | 1.03          | 0.98        | 1.21        | 1.01        | 1.03        | 1           | 1.11        | 1.04        |
| <b>003</b>  | 0.97        | 0.99         | 0.94           | 0.98          | 0.92          | 0.91        | 1.06        | 1.04        | 1.05        | 1           | 0.95        | 0.97        |
| <b>004</b>  | 0.89        | 0.88         | 0.92           | 0.83          | 0.88          | 0.86        | 1.08        | 0.84        | 0.85        | 1           | 0.99        | 0.88        |
| <b>Mean</b> | <b>0.96</b> | <b>0.97</b>  | <b>0.98</b>    | <b>0.94</b>   | <b>0.95</b>   | <b>0.91</b> | <b>1.06</b> | <b>0.93</b> | <b>0.98</b> | <b>1.00</b> | <b>0.98</b> | <b>0.97</b> |
| <b>SD</b>   | <b>0.06</b> | <b>0.08</b>  | <b>0.06</b>    | <b>0.07</b>   | <b>0.06</b>   | <b>0.05</b> | <b>0.12</b> | <b>0.11</b> | <b>0.09</b> | <b>0.00</b> | <b>0.10</b> | <b>0.07</b> |
| <b>101</b>  | 0.90        | 0.86         | 0.90           | 0.87          | 0.81          | 0.83        | 1.14        | 1.02        | 1.00        | 1           | 1.00        | 0.87        |
| <b>102</b>  | 0.96        | 0.96         | 0.97           | 0.95          | 0.93          | 0.87        | 1.03        | 0.98        | 0.97        | 1           | 0.91        | 0.96        |
| <b>103</b>  | 1.00        | 1.02         | 0.95           | 1.01          | 0.94          | 0.97        | 1.18        | 1.08        | 1.03        | 1           | 1.06        | 1.00        |
| <b>104</b>  | 0.99        | 1.03         | 1.02           | 0.95          | 1.02          | 0.87        | 1.01        | 0.89        | 0.89        | 1           | 0.93        | 1.01        |
| <b>105</b>  | 1.01        | 1.00         | 1.05           | 1.04          | 0.93          | 0.98        | 1.12        | 1.05        | 1.10        | 1           | 1.03        | 1.02        |
| <b>Mean</b> | <b>0.97</b> | <b>0.97</b>  | <b>0.98</b>    | <b>0.97</b>   | <b>0.93</b>   | <b>0.90</b> | <b>1.09</b> | <b>1.00</b> | <b>1.00</b> | <b>1.00</b> | <b>0.99</b> | <b>0.97</b> |
| <b>SD</b>   | <b>0.05</b> | <b>0.07</b>  | <b>0.06</b>    | <b>0.07</b>   | <b>0.07</b>   | <b>0.07</b> | <b>0.07</b> | <b>0.07</b> | <b>0.08</b> | <b>0.00</b> | <b>0.07</b> | <b>0.06</b> |

**Table S4.** SUV, SUVR and  $V_T$  values for the 2 patients with blood measurement and without MRI.  $V_T$  calculated with reversible two tissue compartmental model, with blood contribution fixed to 5%.

| Patient     | SUV         |             |             |             | SUVR        |             |             |             | $V_T$       |             |             |             |
|-------------|-------------|-------------|-------------|-------------|-------------|-------------|-------------|-------------|-------------|-------------|-------------|-------------|
|             | Brain       | Cerebellum  | Subcortex   | Cortex      | Brain       | Cerebellum  | Subcortex   | Cortex      | Brain       | Cerebellum  | Subcortex   | Cortex      |
| 106         | 0.66        | 0.72        | 0.75        | 0.67        | 0.92        | 1           | 1.04        | 0.93        | 4.07        | 4.28        | 4.89        | 4.09        |
| 107         | 0.79        | 0.84        | 0.81        | 0.82        | 0.94        | 1           | 0.96        | 0.98        | 3.91        | 4.10        | 4.00        | 4.04        |
| <b>Mean</b> | <b>0.72</b> | <b>0.78</b> | <b>0.78</b> | <b>0.74</b> | <b>0.93</b> | <b>1.00</b> | <b>1.00</b> | <b>0.96</b> | <b>3.99</b> | <b>4.19</b> | <b>4.45</b> | <b>4.07</b> |
| <b>SD</b>   | <b>0.09</b> | <b>0.09</b> | <b>0.04</b> | <b>0.11</b> | <b>0.02</b> | <b>0.00</b> | <b>0.05</b> | <b>0.03</b> | <b>0.12</b> | <b>0.13</b> | <b>0.63</b> | <b>0.03</b> |

**Table S5.** Pearson's correlation coefficient and corresponding p-value of the SUVR values in relevant brain regions versus the activation maps derived with the CRT, memory and Tower of London tasks. Single asterisks mark significant correlation ( $p < 0.05$ ).

|             | CRT whole map |
|-------------|---------------|
| Pearson's r | 0.321         |
| p-value     | 0.400         |
| Pearson's r | 0.220         |
| p-value     | 0.569         |
| Pearson's r | 0.503         |
| p-value     | 0.167         |
| Pearson's r | -0.178        |
| p-value     | 0.646         |
| Pearson's r | -0.113        |
| p-value     | 0.772         |
| Pearson's r | NaN           |
| p-value     | NaN           |
| Pearson's r | 0.297         |
| p-value     | 0.438         |
| Pearson's r | 0.531         |
| p-value     | 0.141         |
| Pearson's r | 0.405         |
| p-value     | 0.279         |
| Pearson's r | 0.718*        |
| p-value     | 0.029         |
| Pearson's r | 0.792*        |
| p-value     | 0.011         |

**Figure S1.** Activation maps from fMRI analysis for the choice reaction time (CRT) task. Mixed-effects (FLAME-1) analysis, and statistical thresholds were set at  $Z > 2.3$ ,  $p < 0.05$  (cluster-corrected for multiple comparisons). The results show motor-related activity in the cerebellum and primary motor cortex, and a set of attention-related regions such as the primary visual cortex, the frontal eye-fields, and parietal regions.

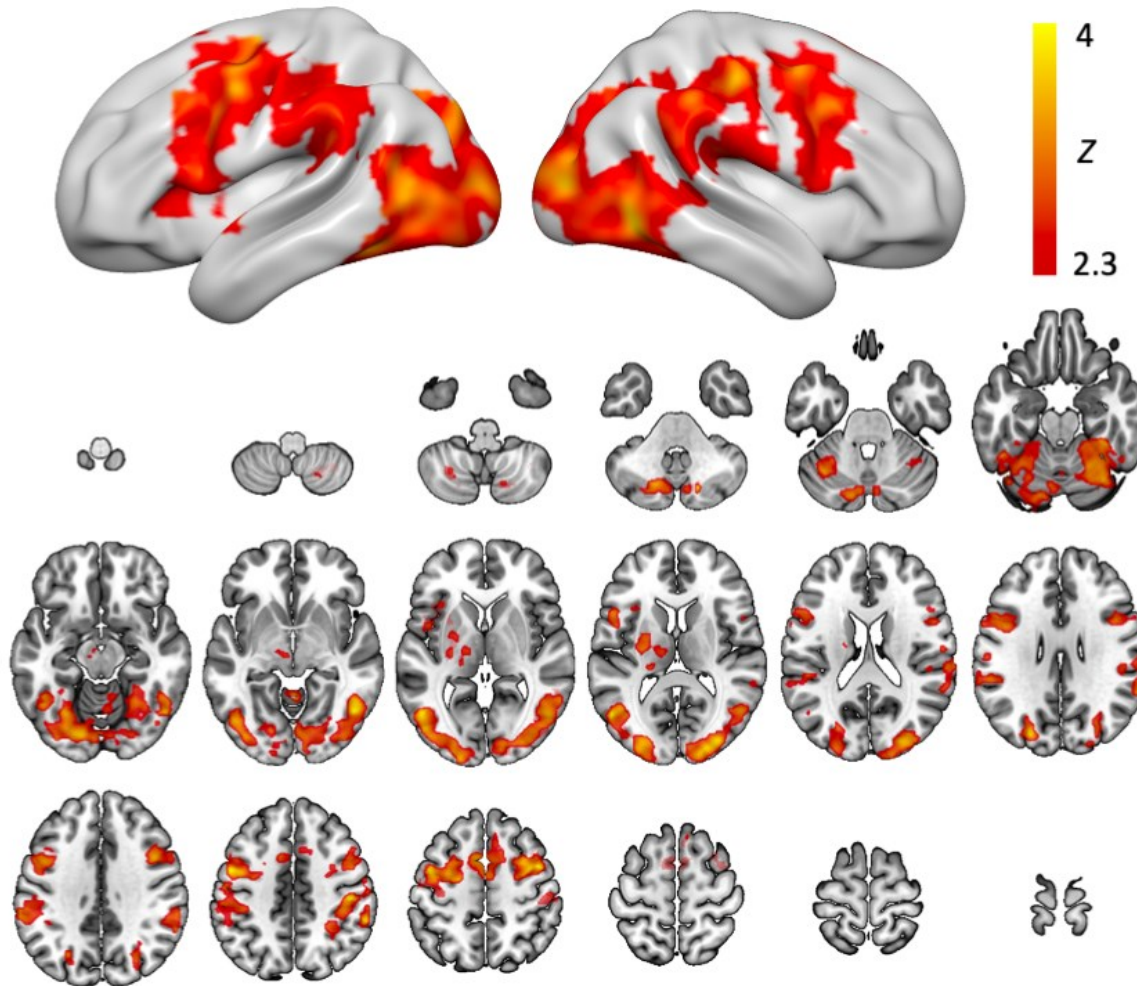

Supplement: f1 [file 6641707.f1.pdf]
